# Supplementary material
Source: PubMed Central journal article supplement (PMC3762693)
Supplement: NIHMS505154-supplement-01.pdf [file NIHMS505154-supplement-01.pdf]

**Figure S1.** WT naive CD4<sup>+</sup> T cells were CFSE labeled and then stimulated with irradiated splenocytes (1:5), anti-CD3e (1 µg/mL), and anti-CD-28 (1 µg/mL), cultured in media containing 5 ng/mL IL-2, 20 µg/mL anti-IL-4, and 20 µg/mL anti-IFNγ and treated with either DMSO or 1 µM GSI. On day 5, cells were washed, restimulated, and cells previously cultured in DMSO were either replated in DMSO or 1 µM GSI, while cells previously cultured in GSI were maintained in GSI. (A) FACS analysis of cell proliferation on day 3 post-activation. (B) Cell numbers on days 3, 5, and 7 post-activation. (C) FACS analysis of CD69 expression on cells days 5 and 7 post-activation. Data are represented as mean +/- SEM. Related to Figure 2.

**Figure S2.** (A) WT naive CD4<sup>+</sup> T cells were CFSE labeled and then stimulated with irradiated splenocytes (1:5), anti-CD3e (1 µg/mL), and anti-CD-28 (1 µg/mL), cultured in media containing 5 ng/mL IL-2, 20 µg/mL anti-IL-4, and 20 µg/mL anti-IFNγ and treated with either DMSO or 1 µM GSI. RNA was harvested on day 5 post-activation and analyzed by qPCR. (B) YFP<sup>fl/fl</sup> or DNAM1L<sup>fl/fl</sup> CD4<sup>+</sup> T cells were Tat-cre treated and rested for 24 hours in media containing 100 ng/mL IL-7. Naive CD4<sup>+</sup> T cells were then FACS sorted and stimulated with irradiated splenocytes (1:5), anti-CD3e (1 µg/mL), and anti-CD-28 (1 µg/mL), and cultured in media containing 5 ng/mL IL-2, 20 µg/mL anti-IL-4, and 20 µg/mL anti-IFNγ. After 5 days, RNA was harvested and analyzed by qPCR. (C) YFP<sup>FL/FL</sup> or DNAM1L<sup>FL/FL</sup> CD4<sup>+</sup> T cells were Tat-cre treated and rested for 24 hours in media containing 100 ng/mL IL-7. Naive CD4<sup>+</sup> T cells were then FACS sorted, labeled with CFSE, and stimulated as above under neutral conditions. After 3 days, cell proliferation was measured by FACS. (D) FACS sorted, Tat-cre treated, naïve CD4<sup>+</sup> T cells from either YFP<sup>FL/FL</sup> or DNAM1L<sup>FL/FL</sup> mice were stimulated as above under neutral conditions. Apoptosis and cell death were measured on day 5 by FACS using Annexin-V and DAPI staining. Data are represented as mean +/- SEM. Related to Figure 3.

**Table S1.** List of qPCR primers used. Related to Figures 3 and 4.

**Table S2.** List of ChIP qPCR primers used. Related to Figures 3 and 4.

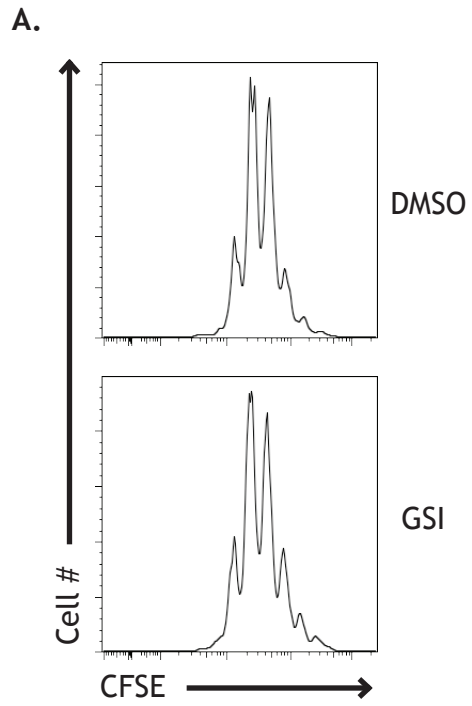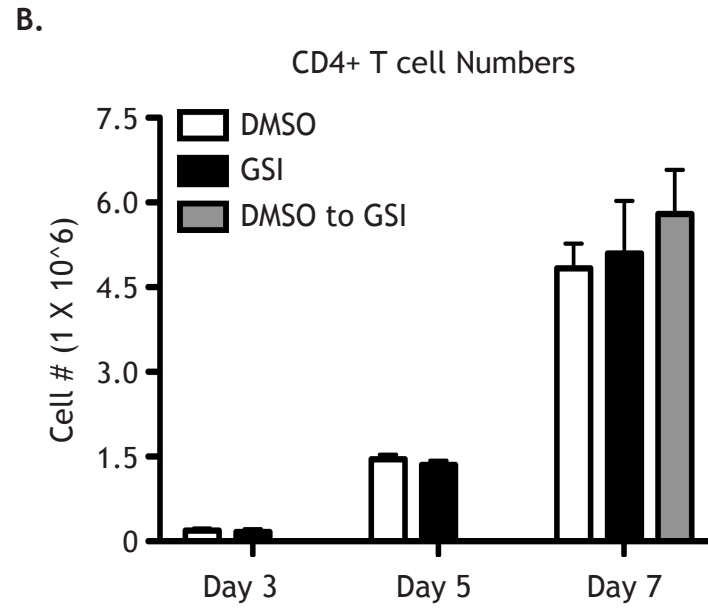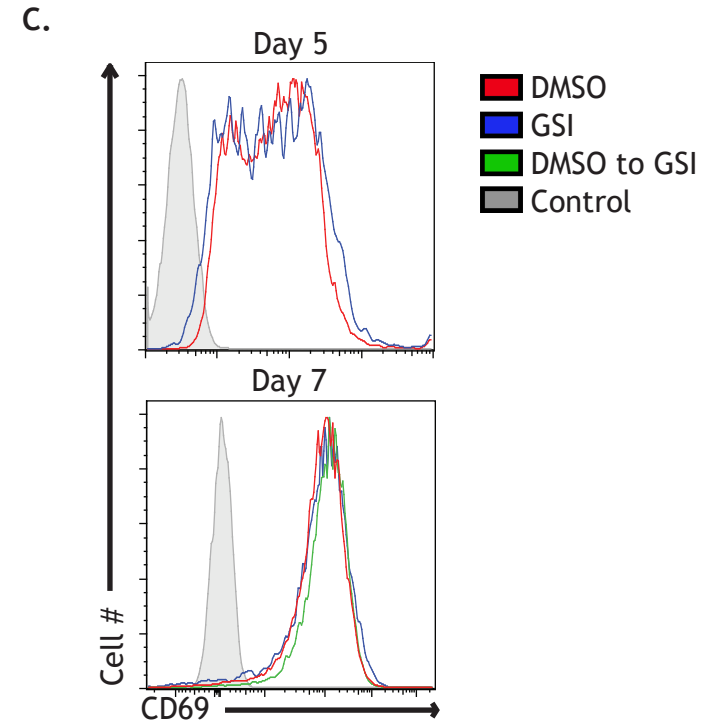

A.

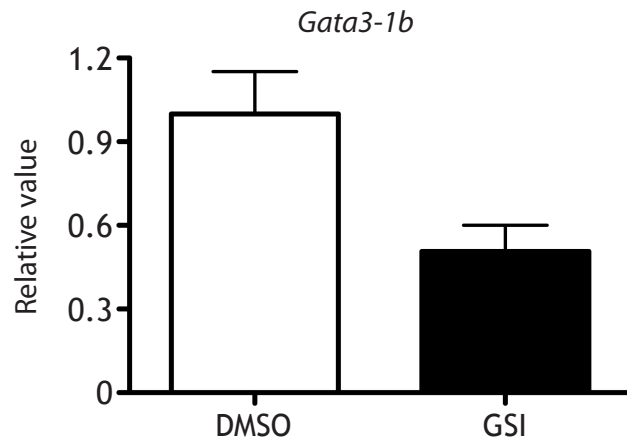

B.

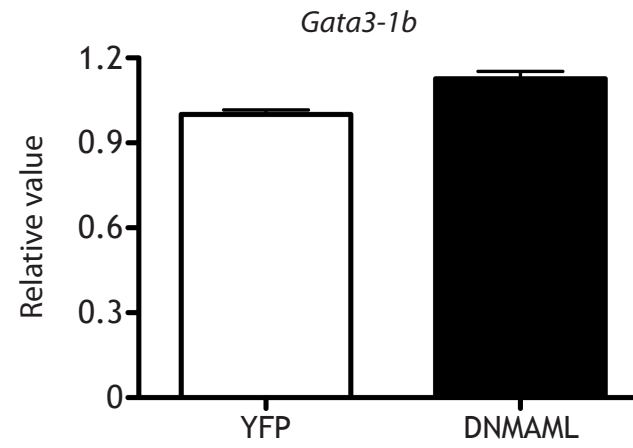

C.

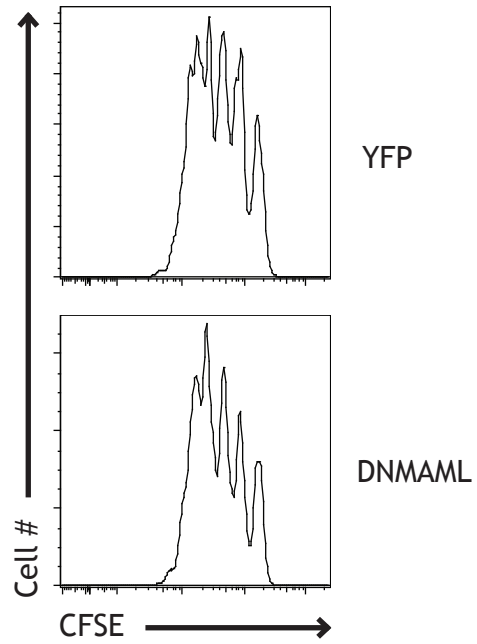

D.

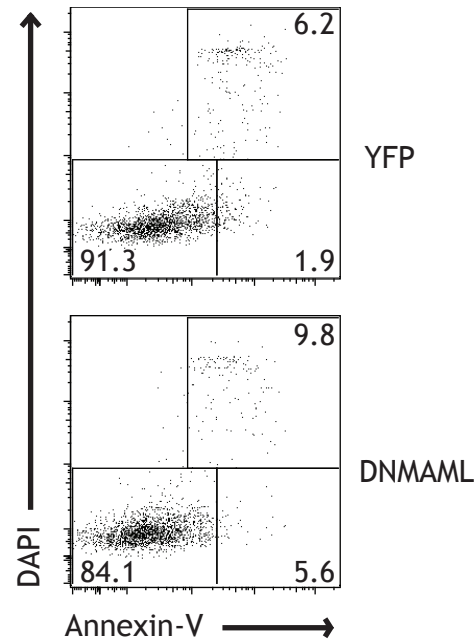

**Supplementary Table 1: Quantitative PCR primer sequences**

|                      |                                |
|----------------------|--------------------------------|
| <i>Il4</i>           | 5'-CATGGAGCTGCAGAGACTCTTTC-3'  |
|                      | 5'-TCCAGGAAGTCTTTCAGTGATGTG-3' |
| <i>Ifng</i>          | 5'-CACGGCACAGTCATTGAAAG-3'     |
|                      | 5'-GCTGATGGCCTGATTGTCTT-3'     |
| <i>Gata3 exon 1a</i> | 5'-CTGGCTGAGATGCAGTGAAG-3'     |
|                      | 5'-GCTCAGAGACGGTTGCTCTT-3'     |
| <i>Gata3 exon 1b</i> | 5'-AGCTGTCTGCGAACACTGAG-3',    |
|                      | 5'-GCTCAGAGACGGTTGCTCTT-3'     |
| <i>Tbx21</i>         | 5'-TCAACCAGCACCCAGACAGAGA-3'   |
|                      | 5'-CCACATCCACAAACATCCTGTAAT-3' |
| <i>Rorc</i>          | 5'-CCGCTGAGAGGGCTTCAC-3'       |
|                      | 5'-TGCAGGAGTAGGCCACATTACA-3'   |
| <i>Il17a</i>         | 5'-TCCACGTCACCCTGGACTCT-3'     |
|                      | 5'-CATGTGGTGGTCCAGCTTTC-3'     |

**Supplementary Table 2: ChIP primer sequences**

|                      |                                 |
|----------------------|---------------------------------|
| <i>Ilf4</i> HS-V     | 5'-TTGAAGTAGCCCTCCTCACGATCA-3'  |
|                      | 5'-AGCCTCCAGACAAATTGGTGAGTG-3'  |
| <i>Ifng</i> CNS-22   | 5'-CAGGAAGGAGATGGGAAGTCA-3'     |
|                      | 5'-CTGTCTTTTGACAATGAGCAGAAAT-3' |
| <i>Gata3</i> exon 1a | 5'-TTCCACAGGGCAGTGTCATT-3'      |
|                      | 5'-CACACAAACCGCACATCAGA-3'      |
| <i>Tbx21</i>         | 5'-AGTCAGCCCTGGGACTCTGA-3'      |
|                      | 5'-TTGGAAGCTGTCTCCAAGAA-3'      |
| <i>Nanog</i>         | 5'-GGCTGCCTCTCCTCGCCCT-3'       |
|                      | 5'-GTGCACACAGCTGGGCCTGA-3'      |
